# Supplementary material for: Comparison of Metabolic Dysfunction-Associated Fatty Liver Disease with Non-Alcoholic Fatty Liver Disease in Identifying Cardiovascular Risk in Chinese Individuals with Rheumatoid Arthritis
Source: Research Square preprint supplement (doi:10.21203/rs.3.rs-1352019/v1), 2022-02-16
Supplement: Supplementary file 1 [file 012f456c95d522f6ea41d238.docx]

**Supplementary materials**

**Supplementary Table S1 The prevalence of metabolic abnormalities in RA patients with MAFLD or NAFLD**

| **Characteristics** | **RA patients**  **(n=513)** | **No-MAFLD**  **(n=403)** | **MAFLD**  **(n=110)** | ***P**** |  | **No-NAFLD**  **(n=408)** | **NAFLD**  **(n=105)** | ***P#*** |
| --- | --- | --- | --- | --- | --- | --- | --- | --- |
| BMI, kg/m2 | 21.7±3.4 | 21.1±3.0 | 24.1±3.7 | **<0.001** |  | 21.1±3.0 | 24.1±3.7 | **<0.001** |
| Overweight/obese, n (%) | 168 (32.7) | 99 (24.6) | 69 (62.7) | **<0.001** |  | 104 (25.5) | 64 (61.0) | **<0.001** |
| WC (male), cm | 82.3±9.6 | 80.8±8.8 | 87.8±10.8 | **0.003** |  | 81.1±8.9 | 86.6±11.1 | **0.018** |
| WC (female), cm | 78.7±9.7 | 76.6±8.5 | 87.0±9.7 | **<0.001** |  | 76.7±8.5 | 86.2±10.4 | **<0.001** |
| Elevated WC, n (%) | 198 (38.6) | 126 (31.3) | 72 (65.5) | **<0.001** |  | 132 (32.4) | 66 (62.9) | **<0.001** |
| SBP, mmHg | 125.7±20.0 | 124.4±19.9 | 130.4±19.8 | **0.005** |  | 124.3±19.9 | 131.1±19.6 | **0.002** |
| DBP, mmHg | 78.8±11.3 | 78.3±11.0 | 80.8±11.9 | **0.044** |  | 78.3±11.1 | 81.1±11.8 | **0.021** |
| Elevated BP, *n* (%) | 255 (49.7) | 183 (45.4) | 72 (65.5) | **<0.001** |  | 186 (45.6) | 69 (65.7) | **0.001** |
| HbA1C% | 5.72±1.08 | 5.59±0.82 | 6.18±1.61 | **0.001** |  | 5.59±0.82 | 6.19±1.63 | **0.001** |
| FPG, mmol/L | 5.62±2.19 | 5.52±2.11 | 5.95±2.46 | 0.095 |  | 5.51±2.11 | 6.02±2.46 | 0.052 |
| FINS, IU/mL | 9.96±6.26 | 9.06±5.32 | 13.72±8.26 | **<0.001** |  | 9.18±5.42 | 13.24±8.24 | **<0.001** |
| HOMA-IR | 2.54±2.33 | 2.27±1.99 | 3.67±3.18 | **0.002** |  | 2.29±2.00 | 3.56±3.19 | **0.004** |
| T2DM, *n* (%) | 79 (15.4) | 45 (11.2) | 34 (30.9) | **<0.001** |  | 48 (11.8) | 31 (29.5) | **<0.001** |
| Prediabetes, *n* (%) | 183 (35.7) | 145 (36.0) | 38 (34.5) | 0.781 |  | 148 (36.3) | 35 (33.3) | 0.707 |
| Elevated HOMA-IR, *n* (%) | 105 (20.5) | 69 (17.1) | 36 (32.7) | **<0.001** |  | 71 (17.4) | 34 (32.4) | **0.001** |
| TC, mmol/L | 4.90±1.22 | 4.77±1.10 | 5.36±1.48 | **<0.001** |  | 4.77±1.10 | 5.39±1.48 | **<0.001** |
| TG, mmol/L | 1.12±0.68 | 1.03±0.52 | 1.47±1.00 | **<0.001** |  | 1.04±0.53 | 1.46±1.00 | **<0.001** |
| Elevated TG, *n* (%) | 63 (12.3) | 36 (8.9) | 27 (24.5) | **<0.001** |  | 38 (9.3) | 25 (23.8) | **<0.001** |
| HDL-C, mmol/L | 1.32±0.36 | 1.31±0.35 | 1.34±0.36 | 0.440 |  | 1.31±0.36 | 1.34±0.36 | 0.464 |
| Reduced HDL-C, *n* (%) | 239 (46.6) | 180 (44.7) | 59 (53.6) | 0.095 |  | 183 (44.9) | 56 (53.3) | 0.120 |
| LDL-C, mmol/L | 3.09±0.88 | 3.00±0.79 | 3.40±1.07 | **<0.001** |  | 3.00±0.79 | 3.44±1.07 | **<0.001** |
| CRP, mg/L | 7.6 (3.3,27.6) | 8.3 (3.3,30.6) | 6.4 (3.3,21.4) | 0.628 |  | 8.1 (3.3,30.5) | 7.2 (3.3,21.6) | 0.869 |
| Elevated CRP, *n* (%) | 296 (57.7) | 233 (57.8) | 63 (57.3) | 0.919 |  | 235 (57.6) | 61 (58.1) | 0.927 |

BMI, body mass index; WC, waist circumference; BP, blood pressure; SBP, systolic blood pressure; DBP, diastolic blood pressure; HbA1C, hemoglobin A1c; FPG, fasting plasma glucose; FINS, fasting insulin; TC, total cholesterol; TG, triglyceride; HDL-C, high-density lipoprotein cholesterol; LDL-C, low-density lipoprotein cholesterol; CRP, C reactive protein

* Compared between RA patients with or without MAFLD

# Compared between RA patients with or without NAFLD

**Supplementary Table S2 Comparisons of disease characteristics among RA patients with three subtypes of MAFLD**

| **Characteristics** | **Overweight/obesity**  **(n=48)** | **Lean/normal weight**  **(n=28)** | **T2DM**  **(n=34)** | ***P*** |
| --- | --- | --- | --- | --- |
| Age, years, mean ± SD | 51.9±9.9 | 53.0±9.3 | 58.9±7.6* | **0.003** |
| Female, n (%) | 40 (83.3) | 19 (67.9) | 26 (76.5) | 0.297 |
| Active smoking, n (%) | 7 (14.6) | 6 (21.4) | 9 (26.5) | 0.405 |
| Disease duration, months, median (IQR) | 60 (25,153) | 67 (22,121) | 50 (13,123) | 0.521 |
| Positive RF, *n* (%) | 35 (72.9) | 20 (71.4) | 24 (70.6) | 0.972 |
| Positive ACPA, *n* (%) | 32 (66.7) | 20 (71.4) | 29 (85.3) | 0.161 |
| Core disease activity indicators |  |  |  |  |
| 28TJC, median (IQR) | 2 (0,7) | 4 (1,14) | 4 (1,8) | 0.509 |
| 28SJC, median (IQR) | 1 (0,6) | 1 (0,5) | 2 (1,7) | 0.322 |
| PtGA, cm, median (IQR) | 3 (2,6) | 5 (2,6) | 5 (3,7) | 0.509 |
| PrGA, cm, median (IQR) | 3 (2,6) | 4 (2,7) | 5 (3,7) | 0.508 |
| Pain VAS, cm, median (IQR) | 3 (2,5) | 4 (2,5) | 4 (3,6) | 0.404 |
| ESR, mm/h, median (IQR) | 31 (21,52) | 38 (14,78) | 47 (21,66) | 0.287 |
| CRP, mg/L, median (IQR) | 6.4 (3.3,18.9) | 5.7 (3.3,22.8) | 7.0 (3.3,21.8) | 0.121 |
| CDAI, median (IQR) | 14 (5,20) | 15.0 (4.5,32.8) | 17.5 (8.0,28.3) | 0.514 |
| Functional indicator |  |  |  |  |
| HAQ-DI, median (IQR) | 0.50 (0.12,1.00) | 0.56 (0.13,1.38) | 0.69 (0.25,1.13) | 0.545 |
| Radiographic indicators |  |  |  |  |
| mTSS, median (IQR) | 6 (2,27) | 9 (0,31) | 12 (4,33) | 0.332 |
| JSN subscore, median (IQR) | 1 (0,17) | 4 (0,19) | 3 (0,11) | 0.219 |
| JE subscore, median (IQR) | 7 (2,20) | 9 (3,28) | 10 (4,25) | 0.494 |
| Previous medications |  |  |  |  |
| Treatment naïve△, *n* (%) | 15 (31.3) | 7 (25.0) | 12 (35.3) | 0.682 |
| Glucocorticoid, *n* (%) | 26 (54.2) | 17 (60.7) | 17 (50.0) | 0.699 |
| csDMARDs, *n* (%) | 26 (54.2) | 20 (71.4) | 18 (52.9) | 0.257 |
| Biologic agents, *n* (%) | 2 (4.2) | 1 (3.6) | 5 (14.7) | 0.133 |

△Treatment naive, without previous corticosteroids or DMARDs treatment for six months before recruited.

RF, rheumatoid factor; ACPA, anti-cyclic citrullinated peptide antibody; 28TJC, 28-joint tender joint counts; 28SJC, 28-joint swollen joint counts; PtGA, patient global assessment of disease activity; PrGA, provider global assessment of disease activity; Pain VAS, pain visual analogue scale; ESR, erythrocyte sedimentation rate; CRP, C reactive protein; CDAI, clinical disease activity index; HAQ-DI, health assessment questionnaire disability index; mTSS, modified total Sharp score; JE, joint erosion; JSN, joint space narrowing; csDMARDs, conventional synthetic disease-modifying anti-rheumatic drugs.

*compared with overweight/obesity group, *P*<0.05

**Supplementary Table S3 Comparisons of liver biochemistry and fibrosis indices among RA patients with three subtypes of MAFLD**

| **Characteristics** | **Overweight/obesity**  **(n=48)** | **Lean/normal weight**  **(n=28)** | **T2DM**  **(n=34)** | ***P*** |
| --- | --- | --- | --- | --- |
| **liver biochemistry** |  |  |  |  |
| ALT, UI/L | 19 (14,28) | 14 (10,23) | 15 (10,25) | **0.031** |
| ULT<ALT<2ULT, n (%) | 6 (12.5) | 4 (14.3) | 3 (8.8) | 0.788 |
| 2ULT<ALT<3ULT, n (%) | 0 (0) | 0 (0) | 2 (5.9) | 0.103 |
| 3ULT<ALT, n (%) | 0 (0) | 0 (0) | 0 (0) | NA |
| AST, UI/L | 17 (14,22) | 17 (14,20) | 16 (13,23) | 0.760 |
| ULN <AST<2 ULN, n (%) | 4 (8.3) | 1(3.6) | 4 (11.8) | 0.503 |
| 2 ULN <AST< 3 ULN, n (%) | 0 (0) | 0 (0) | 0 (0) | NA |
| 3 ULN <AST, n (%) | 0 (0) | 0 (0) | 0 (0) | NA |
| GGT, UI/L | 28 (19,42) | 23 (18,39) | 27 (20,56) | 0.595 |
| ULN <GGT<2ULN, n (%) | 9 (18.8) | 3 (10.7) | 4 (11.8) | 0.322 |
| 2ULN<GGT<3ULN, n (%) | 1 (2.1) | 2 (7.1) | 1 (2.9) | 0.507 |
| 3ULN<GGT, n (%) | 0 (0) | 0 (0) | 4 (11.8)* | **0.010** |
| ALP, UI/L | 74 (63,96) | 84 (64,99) | 86 (71,113) | 0.086 |
| ULN < ALP <2 ULN, n (%) | 1 (2.1) | 1 (3.6) | 4 (11.8) | 0.144 |
| 2 ULN <ALP <3 ULN n (%) | 0 (0) | 0 (0) | 0 (0) | NA |
| 3 ULN < ALP, n (%) | 0 (0) | 0 (0) | 0 (0) | NA |
| TBIL, μmol/L | 8.7 (7.0,10.3) | 9.3 (6.6,10.6) | 7.6 (6.7,10.6) | 0.799 |
| ULN<TBIL<2 ULN, n (%) | 0 (0) | 0 (0) | 1 (2.9) | 0.324 |
| 2 ULN <TBIL<3 ULN, n (%) | 0 (0) | 0 (0) | 0 (0) | NA |
| 3 ULN <TBIL, n (%) | 0 (0) | 0 (0) | 0 (0) | NA |
| ALB, g/L | 35.5 (32.7,39.8) | 34.0 (30.7,36.9) | 34.3 (32.0,36.2) | 0.098 |
| ALB<LLN, n (%) | 16 (33.3) | 13 (46.4) | 18 (52.9) | 0.189 |
| Abnormal LFTs, n (%) | 13 (27.1) | 6 (21.4) | 13 (38.2) | 0.322 |
| **Hepatic steatosis scores** |  |  |  |  |
| FLI | 42.6 (24.3,56.5)# | 10.5 (6.5,18.0) | 29.7 (14.3,66.0)# | **<0.001** |
| FLI ≥ 60, n (%) | 3 (6.3) | 0 (0) | 1 (2.9) | 0.361 |
| **Liver fibrosis score** |  |  |  |  |
| FIB-4 | 0.72 (0.51,1.04) | 0.79 (0.51,1.01) | 0.95 (0.71,1.31)* | **0.036** |
| Advanced fibrosis, n (%) | 3 (6.3) | 3 (10.7) | 10 (29.4)* | **0.011** |
| NFS | -1.84 (-2.88,-0.79) | -2.36 (-3.01,-0.80) | -0.64 (-1.27,-0.01)*# | **<0.001** |
| Advanced fibrosis, n (%) | 14 (29.2) | 6 (21.4) | 20 (58.8)*# | **0.004** |
| Forns index | 4.84 (4.11,5.77) | 4.61 (3.80,6.22) | 5.62 (4.95,6.77)*# | **0.008** |
| Advanced fibrosis, n (%) | 11 (22.9) | 8 (28.6) | 18 (52.9)* | **0.015** |

ALT, alanine aminotransferase; AST, aspartate aminotransferase; GGT, γ-glutamyl transferase; ALP, alkaline phosphatase; TBIL, total bilirubin; ALB, albumin; ULN, upper limit of normal; LLN, lower limit of normal; LFTs, liver function tests; FLI, fatty liver index; FIB-4, fibrosis-4 index; NFS, NAFLD fibrosis score

*compared with overweight/obesity group, *P*<0.05

#compared with lean/normal weight group, *P*<0.05

**Supplementary Table S4 Comparisons of accuracy between MAFLD and NAFLD in identifying CVD events and high 10-years CVD risk in RA patients**

| **Characteristics** | **NRI** | |  | **IDI** | |
| --- | --- | --- | --- | --- | --- |
| ***OR* (95% *CI*)** | ***P*** |  | ***OR* (95% *CI*)** | ***P*** |
| **CVD events** |  |  |  |  |  |
| NAFLD | Ref | Ref |  | Ref | Ref |
| MAFLD | -0.011 (-0.025, 0.003) | 0.131 |  | -0.002 (-0.007, 0.002) | 0.294 |
| **High 10-year CVD risk** |  |  |  |  |  |
| NAFLD | Ref | Ref |  | Ref | Ref |
| MAFLD | 0.012 (-0.014, 0.038) | 0.350 |  | 0.005 (-0.003, 0.013) | 0.197 |

NRI, net reclassification index; IDI, integrated discrimination improvement


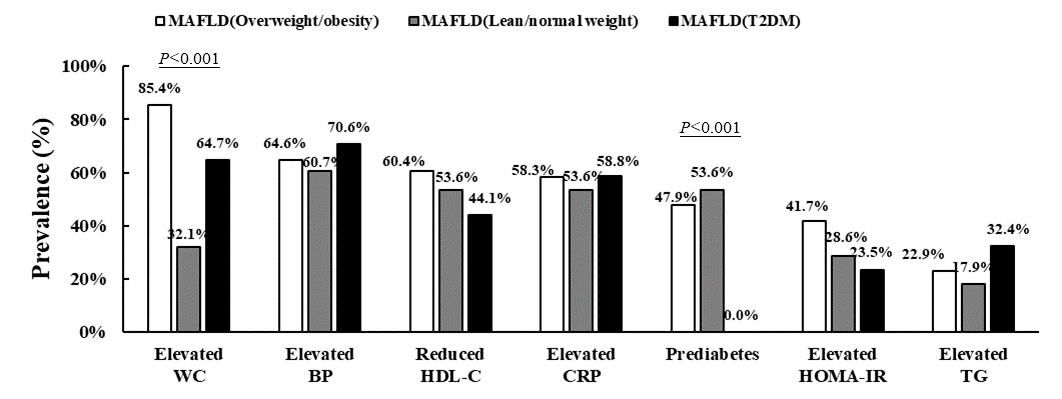


**Supplementary Figure S1 The prevalence of metabolic abnormalities among RA patients with three subtypes of MAFLD**


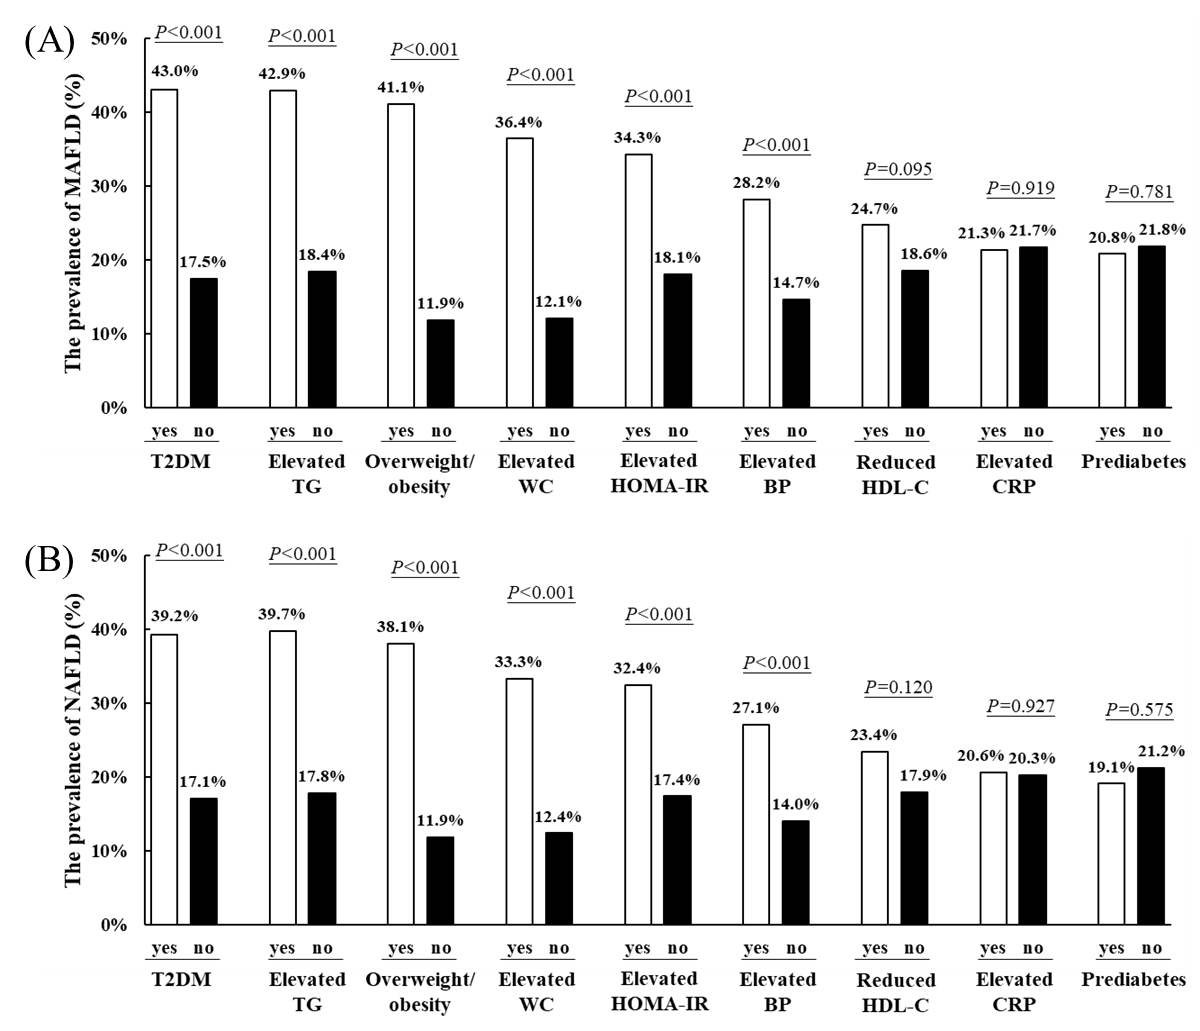


**Supplementary Figure S2 The prevalence of MAFLD (A) and NAFLD (B) in RA patients with different metabolic abnormalities**
